# Supplementary material for: Polyphenol Composition, Antioxidant Capacity and Xanthine Oxidase Inhibition Mechanism of Furong Plum Fruits at Different Maturity Stages
Source: MDPI journal article supplement (doi:10.3390/foods12234253), 2023-11-24
Supplement: s1 [file s1]

1. The experimental parameters of HPLC

Chromatographic column: Sunfire C<sub>18</sub> 150 mm × 4.6 mm 3.5 μm

Analytical standard: proanthocyanidin (chromatographic purity), procyanidin B2 (chromatographic purity), catechin (chromatographic purity), epicatechin (chromatographic purity), myricetin (chromatographic purity), chlorogenic acid (purity ≥ 98%), protocatechuic acid (purity ≥ 99%), ferulic acid (chemically pure), all for Shanghai Yuanye Biotechnology Co., Ltd., China.

Mobile phase A: 0.1% formic acid solution. Mobile phase B: 100% acetonitrile solution. Table S1 showed the Gradient elution procedures.

**Table S1.** Gradient elution procedures.

| Time (min) | Mobile phase A (%) | Mobile phase B (%) |
|------------|--------------------|--------------------|
| 0-5        | 95                 | 5                  |
| 5-35       | 95-75              | 5-25               |
| 35-50      | 75-60              | 25-40              |
| 50-55      | 60                 | 40                 |
| 55-60      | 60-95              | 40-5               |
| 60-70      | 95                 | 5                  |

The flow rate of HPLC was 0.7 mL/min, the injection volume was 20 μL, the column temperature was 40°C, and the detection wavelength was 280 nm.
